# Supplementary material for: Structural diversity and magnetic properties of six metal–organic polymers based on semirigid tricarboxylate ligand of 3,5-bi(4-carboxyphenoxy)benzoic acid
Source: Royal Society of Chemistry journal article supplement (doi:10.1039/c4dt01953a), 2014-01-01
Supplement: c4dt01953a1.pdf [file c4dt01953a1.pdf]

Electronic Supplementary Information (ESI) for Dalton Trans.

# Structural Diversity and Magnetic Properties of Six Metal-Organic Polymers Based on Semirigid Tricarboxylate Ligand of 3,5-Bi(4-carboxyphenoxy)benzoic Acid

Liming Fan,<sup>a</sup> Weiliu Fan,<sup>a</sup> Weikuo Song,<sup>b</sup> Liming Sun,<sup>a</sup> Xian Zhao,<sup>\*a</sup> Xiutang Zhang<sup>\*a,b</sup>

<sup>a</sup> State Key Laboratory of Crystal Materials, Shandong University, Jinan 250100, China.

<sup>b</sup> Advanced Material Institute of Research, College of Chemistry and Chemical Engineering, Qilu Normal University, Jinan, 250013, China.

E-mail: xiutangzhang@163.com (X.Z.); zhaoxian@icm.sdu.edu.cn (X. Zhao).

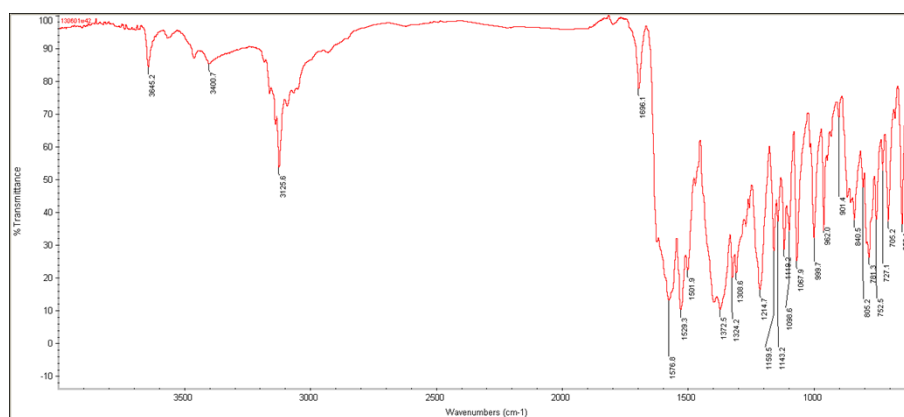

(1)

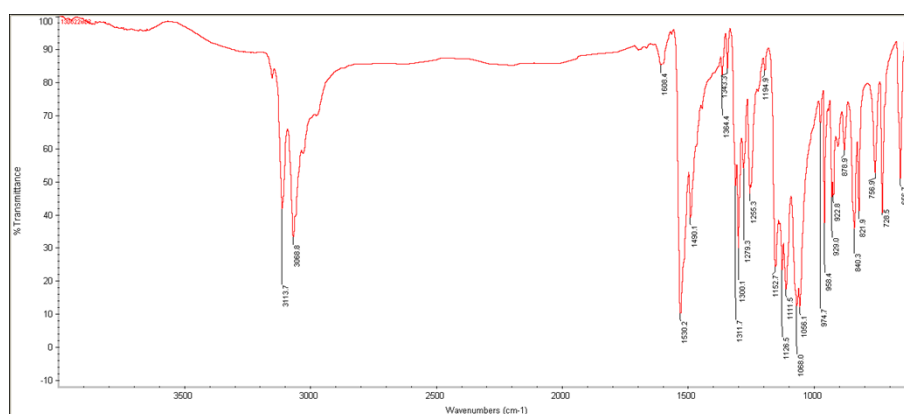

(2)

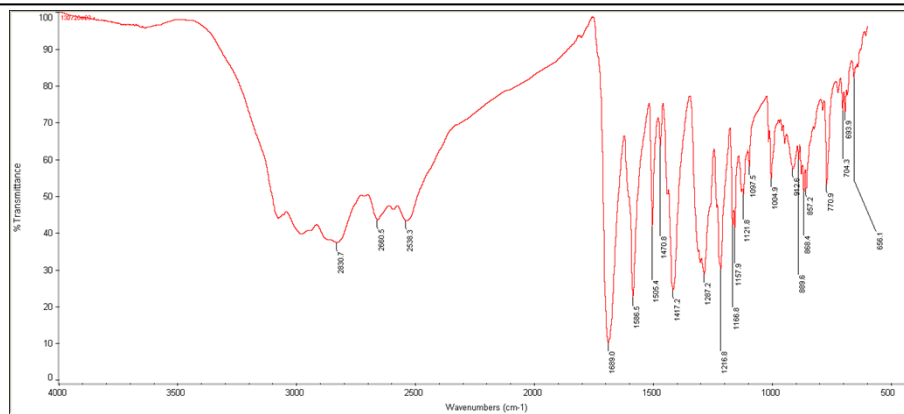

(3)

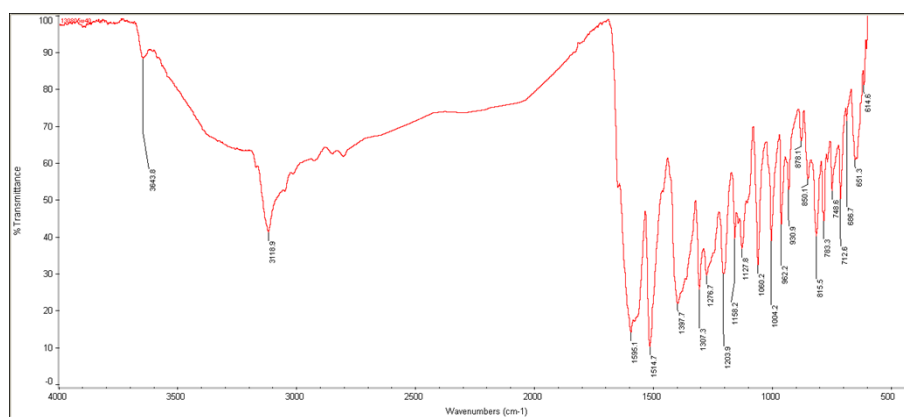

(4)

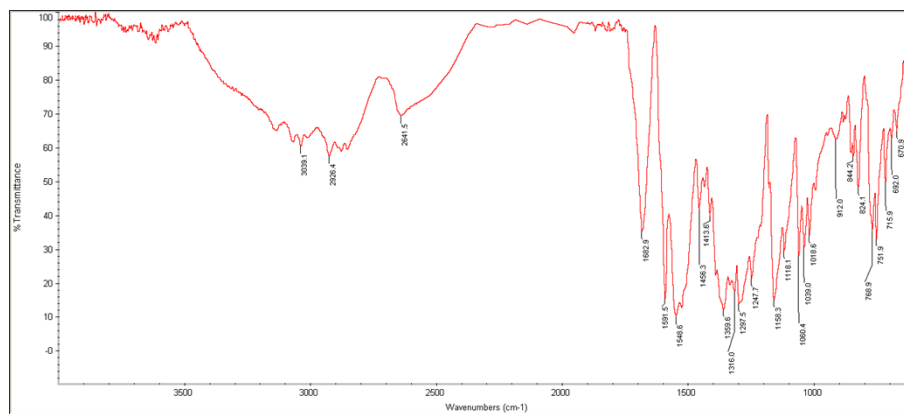

(5)

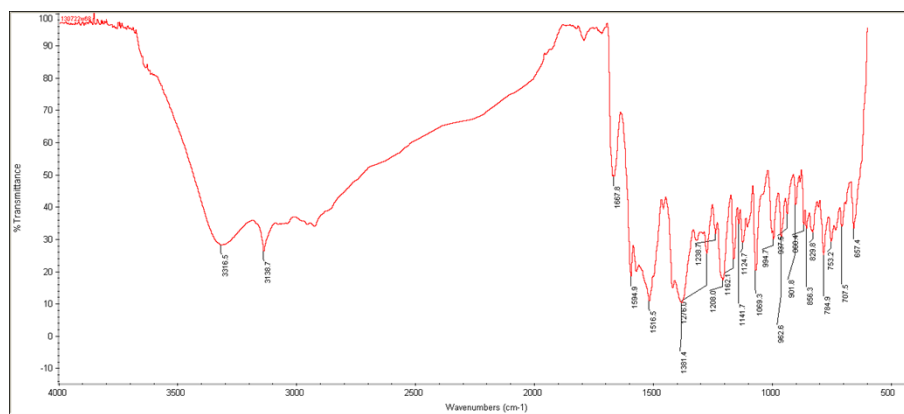

(6)

Figure S1. The IR spectras of complexes 1-6.

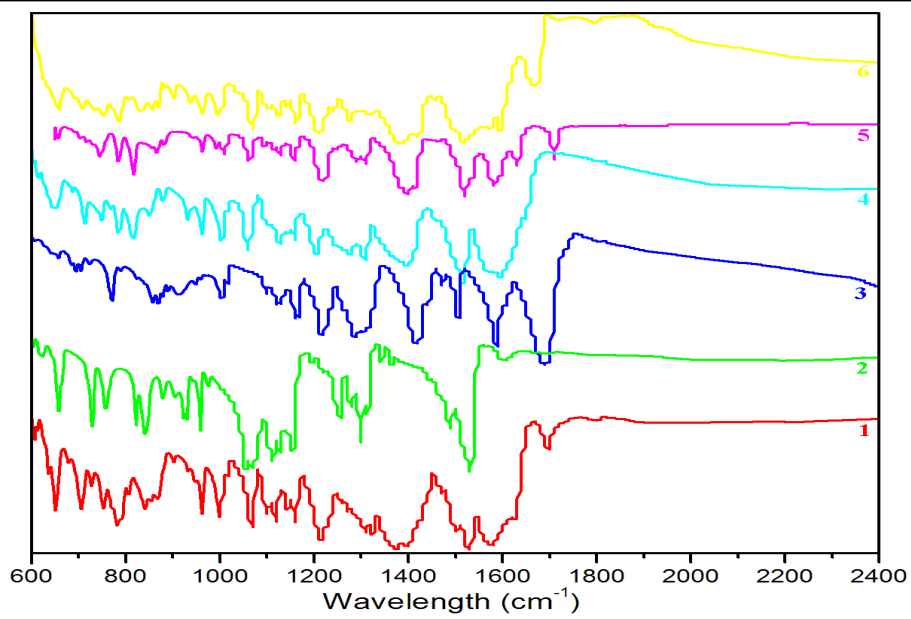

**Figure S2.** The infrared spectras comparisons of 1-6: displaying the positions of the peaks.

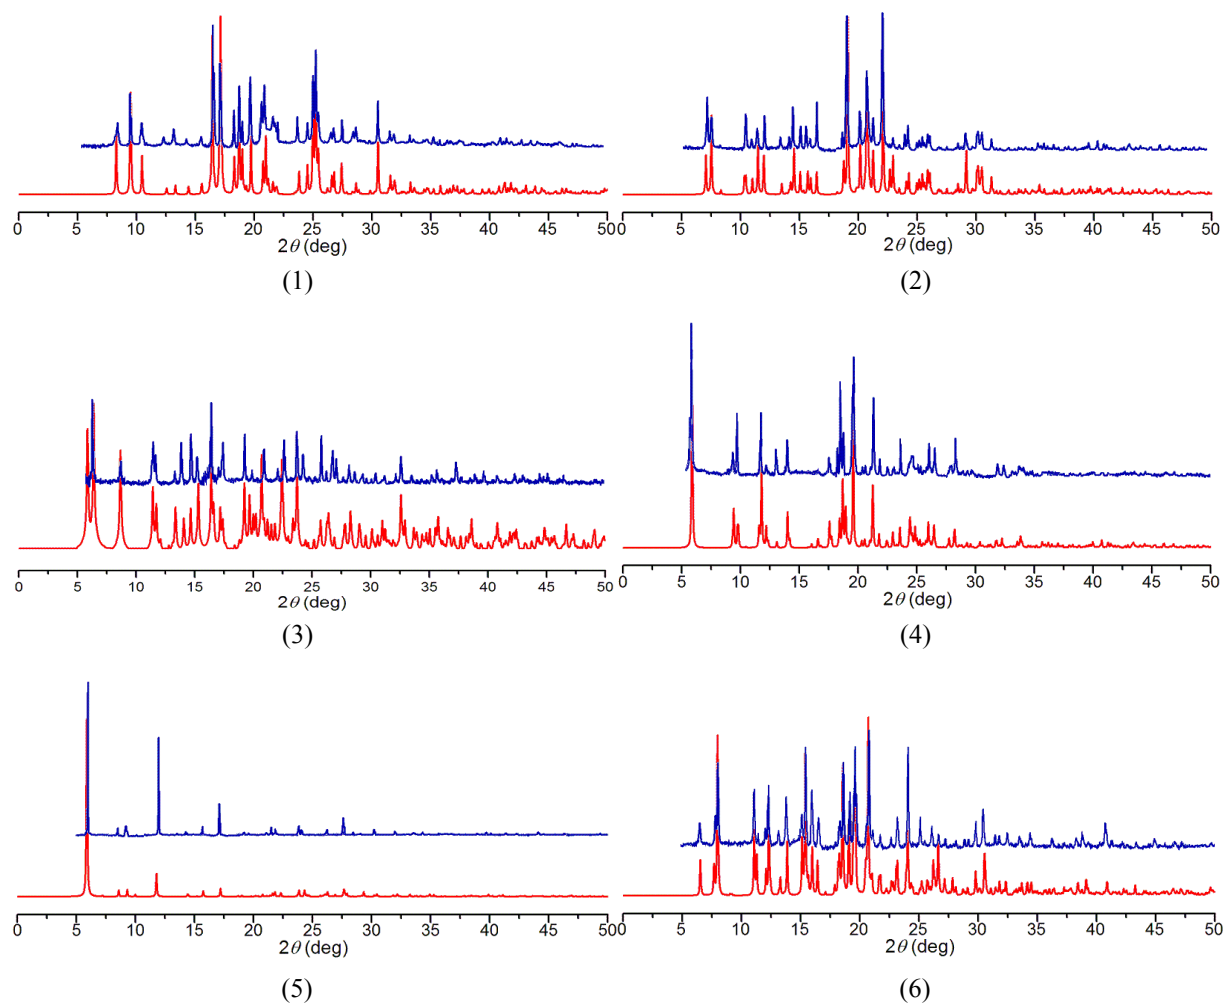

**Figure S3.** PXRD patterns of complexes 1-6. Red: calculated from the X-ray single-crystal data; Blue: observed for the as-synthesized solids.

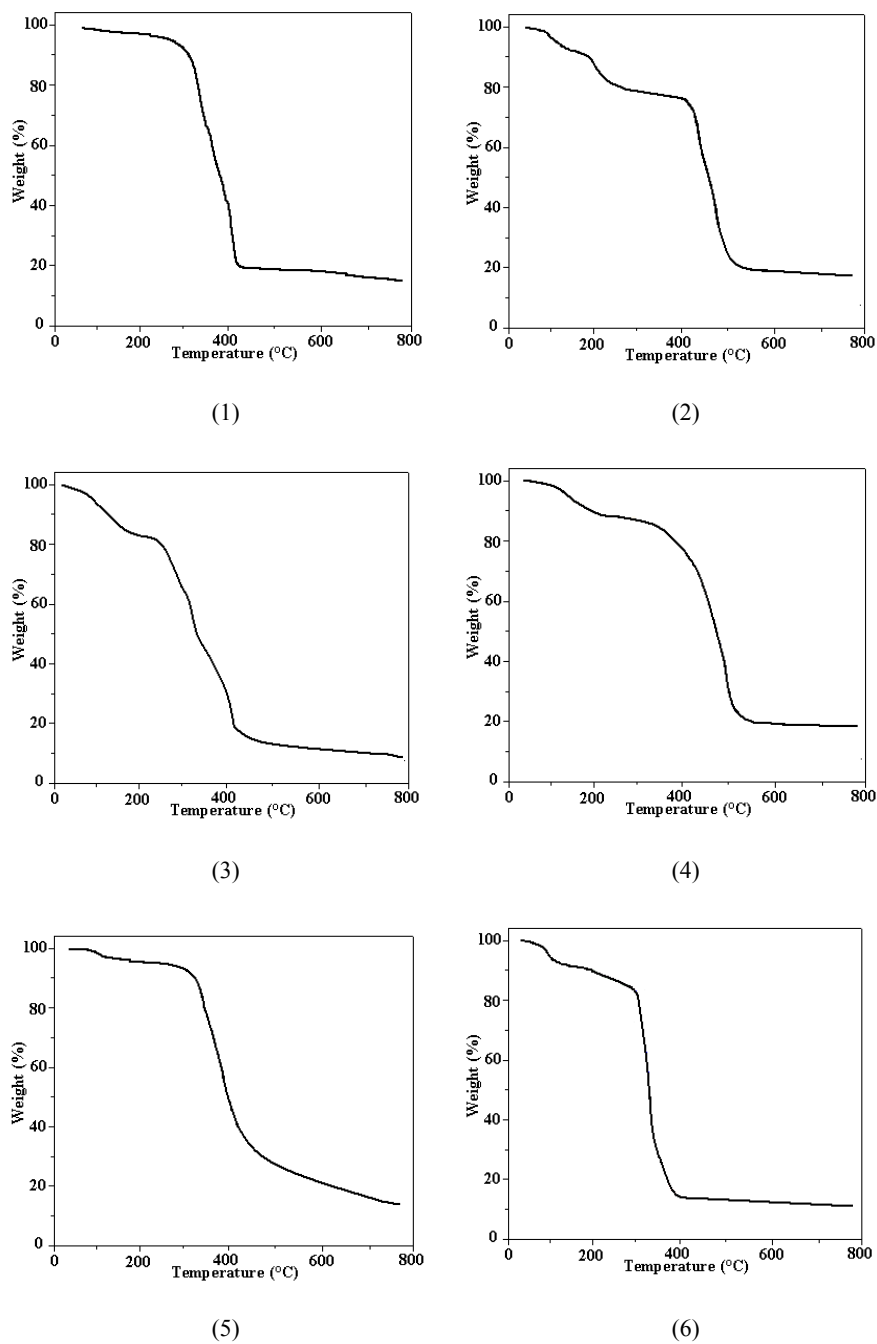

**Figure S4.** TGA curves for compounds 1–6.

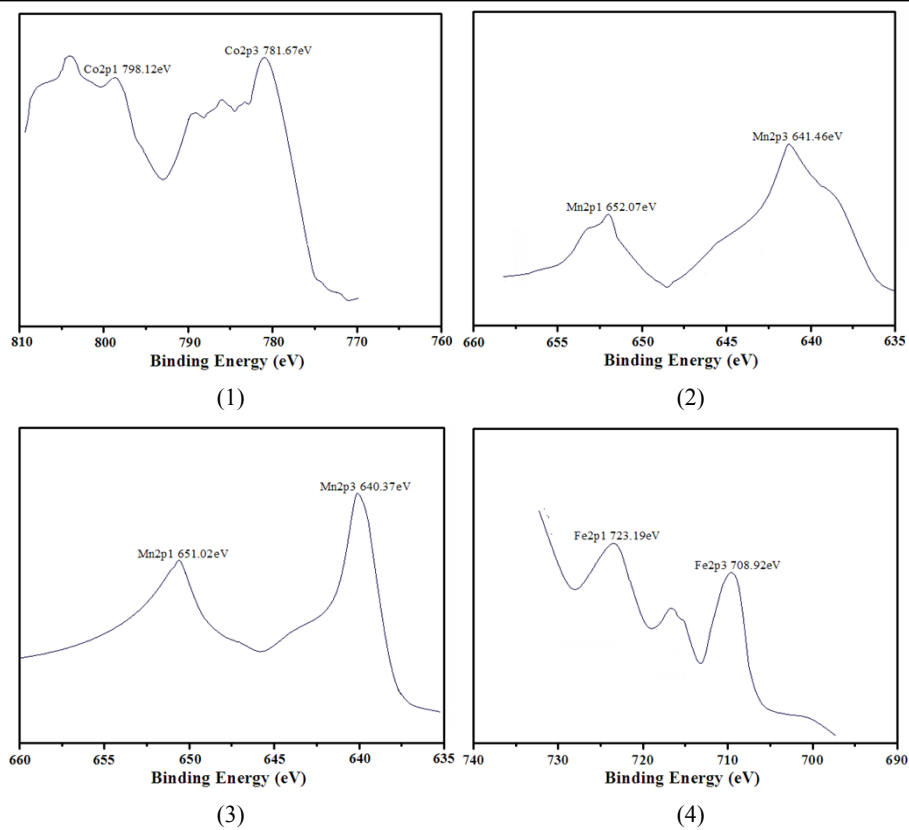

**Figure S5.** X-ray photoelectron (XPS) for compounds 1-4.

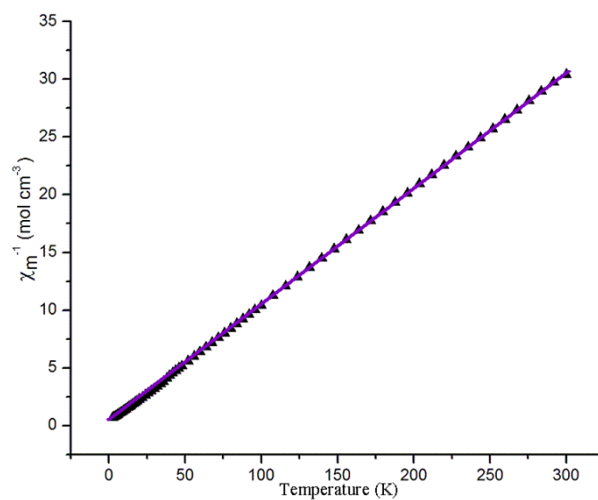

**Figure S6.** The temperature dependence of  $\chi_M^{-1}$  of **2** under a static field of 1000 Oe.

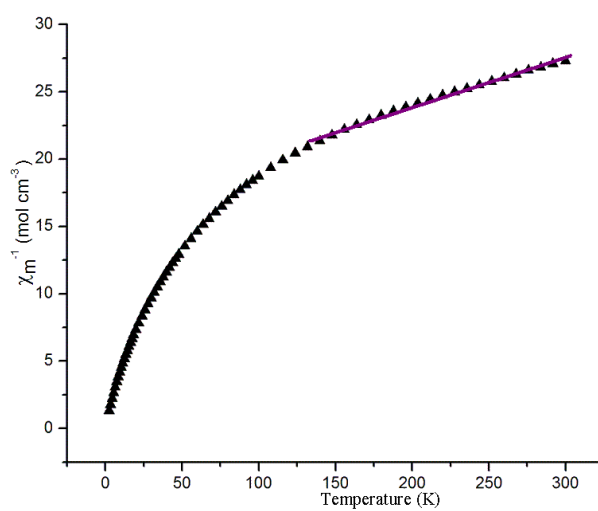

**Figure S7.** The temperature dependence of  $\chi_M^{-1}$  of **4** under a static field of 1000 Oe.

**Table S1** Selected bond lengths (Å) and angles (°) for **1 – 6**.

|                                                                                                                                                                                     |            |                                               |            |                                                |            |                                               |            |
|-------------------------------------------------------------------------------------------------------------------------------------------------------------------------------------|------------|-----------------------------------------------|------------|------------------------------------------------|------------|-----------------------------------------------|------------|
| <b>Complex 1</b>                                                                                                                                                                    |            |                                               |            |                                                |            |                                               |            |
| Co(1)-N(1)                                                                                                                                                                          | 1.9959(17) | Co(1)-O(2)                                    | 1.9703(14) | Co(1)-O(7) <sup>#1</sup>                       | 1.9794(14) | Co(1)-O(4) <sup>#2</sup>                      |            |
| O(2)-Co(1)-O(7) <sup>#1</sup>                                                                                                                                                       | 99.79(6)   | O(2)-Co(1)-O(4) <sup>#2</sup>                 | 124.07(6)  | O(7) <sup>#1</sup> -Co(1)-O(4) <sup>#2</sup>   | 107.07(7)  | O(2)-Co(1)-N(1)                               |            |
| O(7) <sup>#1</sup> -Co(1)-N(1)                                                                                                                                                      | 104.67(6)  | O(4) <sup>#2</sup> -Co(1)-N(1)                | 107.78(6)  |                                                |            |                                               |            |
| Symmetry code: #1 -x+1, y-1/2, -z+3/2; #2 -x+1, y+1/2, -z+3/2.                                                                                                                      |            |                                               |            |                                                |            |                                               |            |
| <b>Complex 2</b>                                                                                                                                                                    |            |                                               |            |                                                |            |                                               |            |
| Mn(1)-O(2W)                                                                                                                                                                         | 2.158(3)   | Mn(1)-O(5) <sup>#1</sup>                      | 2.160(2)   | Mn(1)-N(1)                                     | 2.178(3)   | Mn(1)-O(1)                                    | 2.195(2)   |
| Mn(1)-O(1W)                                                                                                                                                                         | 2.219(3)   | Mn(1)-O(3W)                                   | 2.268(2)   | Mn(2)-O(6) <sup>#1</sup>                       | 2.106(2)   | Mn(2)-O(6) <sup>#2</sup>                      | 2.106(2)   |
| Mn(2)-O(8) <sup>#3</sup>                                                                                                                                                            | 2.195(2)   | Mn(2)-O(8) <sup>#4</sup>                      | 2.195(2)   | Mn(2)-O(3W)                                    | 2.267(2)   | Mn(2)-O(3W) <sup>#5</sup>                     | 2.267(2)   |
| O(2W)-Mn(1)-O(5) <sup>#1</sup>                                                                                                                                                      | 92.45(11)  | O(2W)-Mn(1)-N(1)                              | 167.34(11) | O(1W)-Mn(1)-O(3W)                              | 177.57(9)  | O(1)-Mn(1)-O(1W)                              | 91.82(10)  |
| N(1)-Mn(1)-O(1W)                                                                                                                                                                    | 84.27(11)  | O(5) <sup>#1</sup> -Mn(1)-N(1)                | 86.81(10)  | O(2W)-Mn(1)-O(1W)                              | 83.21(10)  | N(1)-Mn(1)-O(3W)                              | 95.42(10)  |
| O(1)-Mn(1)-O(3W)                                                                                                                                                                    | 85.81(8)   | O(2W)-Mn(1)-O(1)                              | 86.32(11)  | O(5) <sup>#1</sup> -Mn(1)-O(1W)                | 95.18(10)  | O(5) <sup>#1</sup> -Mn(1)-O(3W)               | 87.20(9)   |
| N(1)-Mn(1)-O(1)                                                                                                                                                                     | 95.96(11)  | O(5) <sup>#1</sup> -Mn(1)-O(1)                | 172.70(10) | O(2W)-Mn(1)-O(3W)                              | 97.17(9)   | O(8) <sup>#4</sup> -Mn(2)-O(3W)               | 85.09(8)   |
| O(6) <sup>#1</sup> -Mn(2)-O(6) <sup>#2</sup>                                                                                                                                        | 180.00(14) | O(6) <sup>#1</sup> -Mn(2)-O(8) <sup>#4</sup>  | 88.31(10)  | O(6) <sup>#1</sup> -Mn(2)-O(3W) <sup>#5</sup>  | 93.15(8)   | O(6) <sup>#1</sup> -Mn(2)-O(3W)               | 86.85(8)   |
| O(6) <sup>#1</sup> -Mn(2)-O(8) <sup>#3</sup>                                                                                                                                        | 91.69(10)  | O(6) <sup>#2</sup> -Mn(2)-O(8) <sup>#4</sup>  | 91.69(10)  | O(8) <sup>#4</sup> -Mn(2)-O(3W) <sup>#5</sup>  | 94.91(8)   | O(6) <sup>#2</sup> -Mn(2)-O(3W)               | 93.15(8)   |
| O(6) <sup>#2</sup> -Mn(2)-O(8) <sup>#3</sup>                                                                                                                                        | 88.31(10)  | O(8) <sup>#3</sup> -Mn(2)-O(8) <sup>#4</sup>  | 180.00(13) | O(8) <sup>#3</sup> -Mn(2)-O(3W) <sup>#5</sup>  | 85.09(8)   | O(8) <sup>#3</sup> -Mn(2)-O(3W)               | 94.91(8)   |
| Symmetry codes: #1 x+1/2, -y+3/2, z-1/2; #2 -x+1/2, y-1/2, -z+1/2; #3 -x+1/2, y+1/2, -z+1/2; #4 x+1/2, -y+1/2, z-1/2; #5 -x+1, -y+1, -z.                                            |            |                                               |            |                                                |            |                                               |            |
| <b>Complex 3</b>                                                                                                                                                                    |            |                                               |            |                                                |            |                                               |            |
| Mn(1)-N(3)                                                                                                                                                                          | 2.1345(17) | Mn(1)-O(9)                                    | 2.0877(14) | Mn(1)-N(1)                                     | 2.2124(16) | O(9) <sup>#3</sup> -Mn(1)-O(9)                | 180.00(9)  |
| O(9)-Mn(1)-N(3)                                                                                                                                                                     | 90.81(6)   | O(9)-Mn(1)-N(3) <sup>#3</sup>                 | 89.19(6)   | N(3) <sup>#3</sup> -Mn(1)-N(3)                 | 180.00(10) | N(3)-Mn(1)-N(1) <sup>#3</sup>                 | 94.65(6)   |
| O(9) <sup>#3</sup> -Mn(1)-N(1)                                                                                                                                                      | 91.23(6)   | O(9)-Mn(1)-N(1)                               | 88.77(6)   | N(3)-Mn(1)-N(1)                                | 85.35(6)   | N(1) <sup>#3</sup> -Mn(1)-N(1)                | 180.0      |
| Symmetry codes: #3 -x+1, -y, -z+1.                                                                                                                                                  |            |                                               |            |                                                |            |                                               |            |
| <b>Complex 4</b>                                                                                                                                                                    |            |                                               |            |                                                |            |                                               |            |
| Fe(1)-O(2)                                                                                                                                                                          | 2.052(2)   | Fe(1)-O(1)                                    | 2.098(2)   | Fe(1)-O(5)                                     | 2.170(2)   | Fe(1)-N(1)                                    | 2.180(3)   |
| Fe(1)-O(5) <sup>#3</sup>                                                                                                                                                            | 2.290(2)   | Fe(1)-O(3) <sup>#1</sup>                      | 2.106(2)   | O(2)-Fe(1)-O(1)                                | 167.12(10) | O(1)-Fe(1)-O(3) <sup>#1</sup>                 | 87.01(10)  |
| O(2)-Fe(1)-O(5) <sup>#3</sup>                                                                                                                                                       | 81.44(9)   | O(1)-Fe(1)-N(1)                               | 85.42(10)  | O(2)-Fe(1)-O(3) <sup>#1</sup>                  | 104.71(10) | O(2)-Fe(1)-O(5)                               | 94.39(10)  |
| O(1)-Fe(1)-O(5) <sup>#3</sup>                                                                                                                                                       | 87.08(9)   | O(3) <sup>#1</sup> -Fe(1)-N(1)                | 84.80(11)  | O(3) <sup>#1</sup> -Fe(1)-O(5)                 | 100.23(10) | O(1)-Fe(1)-O(5)                               | 88.65(9)   |
| O(3) <sup>#1</sup> -Fe(1)-O(5) <sup>#3</sup>                                                                                                                                        | 173.51(8)  | O(5)-Fe(1)-N(1)                               | 172.03(9)  | O(2)-Fe(1)-N(1)                                | 90.26(11)  | N(1)-Fe(1)-O(5) <sup>#3</sup>                 | 97.40(10)  |
| O(5)-Fe(1)-O(5) <sup>#3</sup>                                                                                                                                                       | 76.95(9)   |                                               |            |                                                |            |                                               |            |
| Symmetry code: #1 -x, y, -z+1/2; #3 -x+1/2, -y+1, z.                                                                                                                                |            |                                               |            |                                                |            |                                               |            |
| <b>Complex 5</b>                                                                                                                                                                    |            |                                               |            |                                                |            |                                               |            |
| Ni(1)-O(15) <sup>#3</sup>                                                                                                                                                           | 2.016(4)   | Ni(1)-N(8) <sup>#5</sup>                      | 2.058(5)   | Ni(1)-O(9)                                     | 2.206(5)   | Ni(3)-O(18) <sup>#6</sup>                     | 2.041(7)   |
| Ni(1)-O(16) <sup>#4</sup>                                                                                                                                                           | 2.051(5)   | Ni(1)-O(10)                                   | 2.161(4)   | Ni(3)-O(18)                                    | 2.041(7)   | Ni(3)-N(4) <sup>#7</sup>                      | 2.070(6)   |
| Ni(3)-N(4) <sup>#8</sup>                                                                                                                                                            | 2.070(6)   | Ni(3)-O(19) <sup>#6</sup>                     | 2.073(12)  | Ni(2)-O(5)                                     | 2.023(5)   | Ni(2)-O(2)                                    | 2.211(6)   |
| Ni(3)-O(19)                                                                                                                                                                         | 2.073(12)  | Ni(2)-O(3)                                    | 2.012(5)   | Ni(2)-O(2) <sup>#9</sup>                       | 2.112(5)   | Ni(2)-O(1)                                    | 2.212(8)   |
| O(15) <sup>#3</sup> -Ni(1)-N(5)                                                                                                                                                     | 91.6(2)    | N(5)-Ni(1)-N(8) <sup>#5</sup>                 | 176.0(2)   | O(16) <sup>#4</sup> -Ni(1)-O(10)               | 95.45(19)  | O(16) <sup>#4</sup> -Ni(1)-O(9)               | 154.16(19) |
| O(15) <sup>#3</sup> -Ni(1)-O(16) <sup>#4</sup>                                                                                                                                      | 110.0(2)   | O(16) <sup>#4</sup> -Ni(1)-N(8) <sup>#5</sup> | 84.3(2)    | N(8) <sup>#5</sup> -Ni(1)-O(10)                | 90.6(2)    | N(8) <sup>#5</sup> -Ni(1)-O(9)                | 87.34(19)  |
| N(5)-Ni(1)-O(16) <sup>#4</sup>                                                                                                                                                      | 92.1(2)    | O(15) <sup>#3</sup> -Ni(1)-O(10)              | 154.25(19) | O(15) <sup>#3</sup> -Ni(1)-O(9)                | 94.08(17)  | O(10)-Ni(1)-O(9)                              | 60.17(16)  |
| O(15) <sup>#3</sup> -Ni(1)-N(8) <sup>#5</sup>                                                                                                                                       | 88.1(2)    | N(5)-Ni(1)-O(10)                              | 91.42(19)  | N(5)-Ni(1)-O(9)                                | 96.6(2)    | O(18)-Ni(3)-O(18) <sup>#6</sup>               | 180.000(3) |
| O(18)-Ni(3)-N(4) <sup>#7</sup>                                                                                                                                                      | 88.8(3)    | N(4) <sup>#7</sup> -Ni(3)-N(4) <sup>#8</sup>  | 180.000(2) | N(4) <sup>#8</sup> -Ni(3)-O(19)                | 95.3(4)    | N(4) <sup>#8</sup> -Ni(3)-O(19) <sup>#6</sup> | 84.7(4)    |
| O(18) <sup>#6</sup> -Ni(3)-N(4) <sup>#7</sup>                                                                                                                                       | 91.2(3)    | O(18)-Ni(3)-O(19)                             | 70.6(4)    | O(18)-Ni(3)-O(19) <sup>#6</sup>                | 109.4(4)   | O(19)-Ni(3)-O(19) <sup>#6</sup>               | 180.000(3) |
| O(18)-Ni(3)-N(4) <sup>#8</sup>                                                                                                                                                      | 91.2(3)    | O(18) <sup>#6</sup> -Ni(3)-O(19)              | 109.4(4)   | O(18) <sup>#6</sup> -Ni(3)-O(19) <sup>#6</sup> | 70.6(4)    | O(3)-Ni(2)-O(5)                               | 176.8(3)   |
| O(18) <sup>#6</sup> -Ni(3)-N(4) <sup>#8</sup>                                                                                                                                       | 88.8(3)    | N(4) <sup>#7</sup> -Ni(3)-O(19)               | 84.7(4)    | N(4) <sup>#7</sup> -Ni(3)-O(19) <sup>#6</sup>  | 95.3(4)    | O(3)-Ni(2)-N(1)                               | 91.1(2)    |
| O(5)-Ni(2)-N(1)                                                                                                                                                                     | 90.0(2)    | O(3)-Ni(2)-O(2)                               | 90.2(3)    | O(3)-Ni(2)-O(1)                                | 88.4(3)    | O(2) <sup>#9</sup> -Ni(2)-O(1)                | 88.8(3)    |
| O(3)-Ni(2)-O(2) <sup>#9</sup>                                                                                                                                                       | 89.1(2)    | O(5)-Ni(2)-O(2)                               | 92.6(3)    | O(5)-Ni(2)-O(1)                                | 88.6(3)    | O(2)-Ni(2)-O(1)                               | 171.1(3)   |
| O(5)-Ni(2)-O(2) <sup>#9</sup>                                                                                                                                                       | 89.8(2)    | N(1)-Ni(2)-O(2)                               | 95.8(3)    | N(1)-Ni(2)-O(1)                                | 93.1(4)    | O(2) <sup>#9</sup> -Ni(2)-O(2)                | 82.4(2)    |
| N(1)-Ni(2)-O(2) <sup>#9</sup>                                                                                                                                                       | 178.1(3)   |                                               |            |                                                |            |                                               |            |
| Symmetry codes: #1 x+1, y+1, z-1; #2 x, y, z+1; #3 x+1, y-1, z-1; #4 -x+2, -y+1, -z+1; #5 x, y, z-1; #6 -x, -y+1, -z+3; #7 x-1, y-1, z+1; #8 -x+1, -y+2, -z+2; #9 -x+1, -y+1, -z+1. |            |                                               |            |                                                |            |                                               |            |
| <b>Complex 6</b>                                                                                                                                                                    |            |                                               |            |                                                |            |                                               |            |
| Ni(1)-O(1)                                                                                                                                                                          | 2.0387(2)  | Ni(1)-O(2W)                                   | 2.0701(18) | Ni(1)-N(5)                                     | 2.077(2)   | Ni(1)-O(1W)                                   | 2.0966(18) |
| Ni(1)-N(1)                                                                                                                                                                          | 2.132(2)   | Ni(1)-N(3)                                    | 2.134(2)   | O(1)-Ni(1)-O(2W)                               | 91.88(7)   | O(1)-Ni(1)-N(5)                               | 170.58(8)  |
| O(2W)-Ni(1)-N(5)                                                                                                                                                                    | 97.54(8)   | O(1)-Ni(1)-O(1W)                              | 82.01(7)   | O(2W)-Ni(1)-O(1W)                              | 173.86(7)  | N(5)-Ni(1)-O(1W)                              | 88.57(8)   |
| O(1)-Ni(1)-N(1)                                                                                                                                                                     | 88.66(8)   | O(2W)-Ni(1)-N(1)                              | 90.60(8)   | N(5)-Ni(1)-N(1)                                | 91.31(8)   | O(1W)-Ni(1)-N(1)                              | 88.73(8)   |
| O(1)-Ni(1)-N(3)                                                                                                                                                                     | 88.97(8)   | O(2W)-Ni(1)-N(3)                              | 87.32(8)   | N(5)-Ni(1)-N(3)                                | 91.38(8)   | N(1)-Ni(1)-N(3)                               | 176.79(8)  |
